# Supplementary material for: Molecular, electronic structure and spectroscopic properties of MM quadruply bonded units supported by trans-6-carboethoxy-2-carboxylatoazulene ligands
Source: Royal Society of Chemistry journal article supplement (doi:10.1039/b919282d), 2010-01-01
Supplement: b919282d.pdf [file b919282d.pdf]

## Electronic Supplementary Information

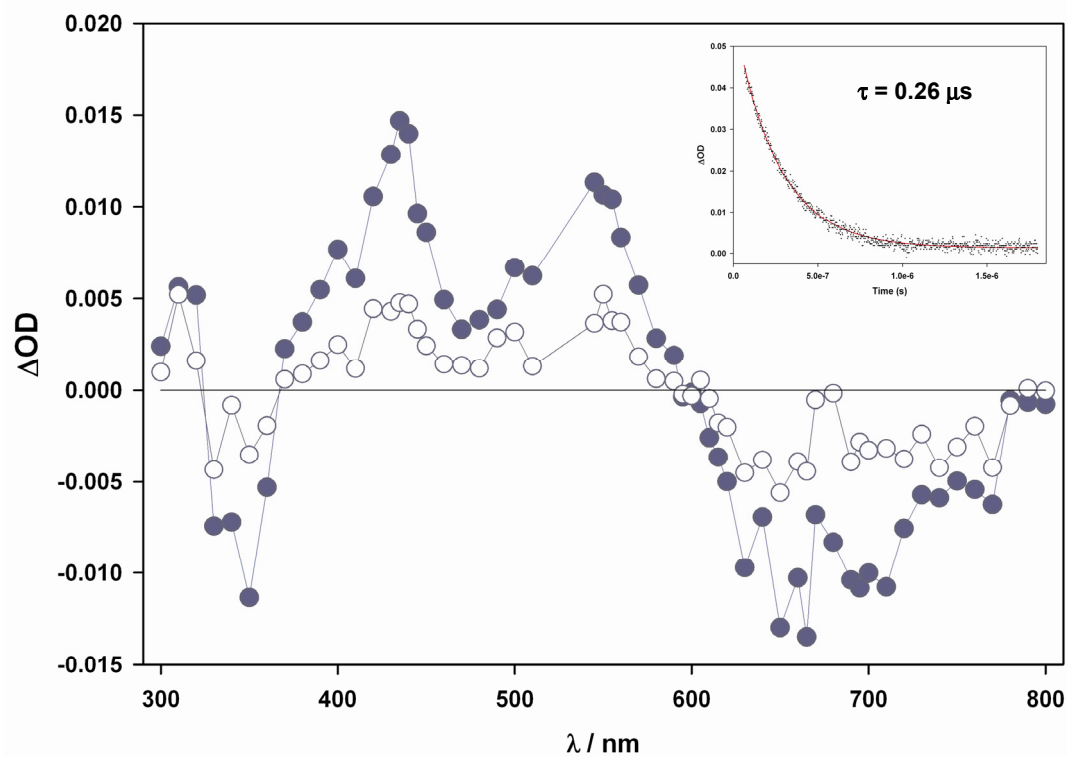

Figure S1: ns-TA spectra of Mo<sub>2</sub>azulene<sub>2</sub>TiPB<sub>2</sub>.  $\lambda_{exc} = 532$  nm, in THF.  
Blue circles = 0.00400  $\mu$ s, White circles = 0.30400  $\mu$ s following laser pump at 532 nm,  $\tau = 260$  ns  
Inset: Decay of absorption at 440 nm.

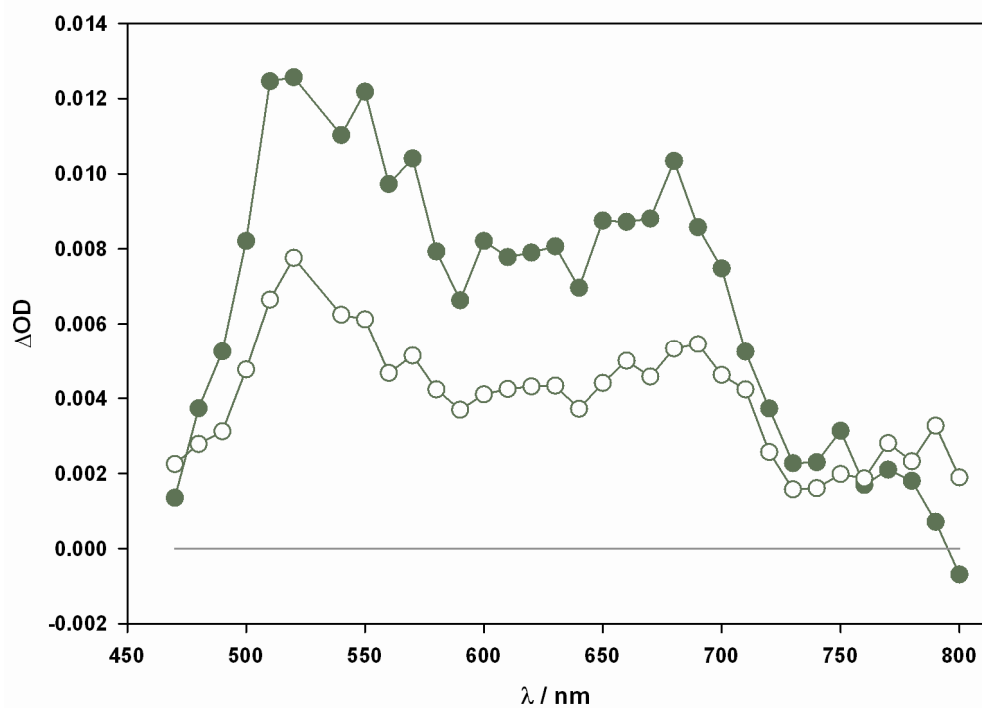

**Figure S2: ns-TA spectra of  $W_2\text{azulene}_2\text{TiPB}_2$ .  $\lambda_{\text{exc}} = 355 \text{ nm}$ , in THF.  
Green circles = 0.01975  $\mu\text{s}$ , White circles = 0.03050  $\mu\text{s}$  following laser pump at 355 nm  
Lifetime too fast to be accurately determined within the limits of instrument (< 20 ns).**

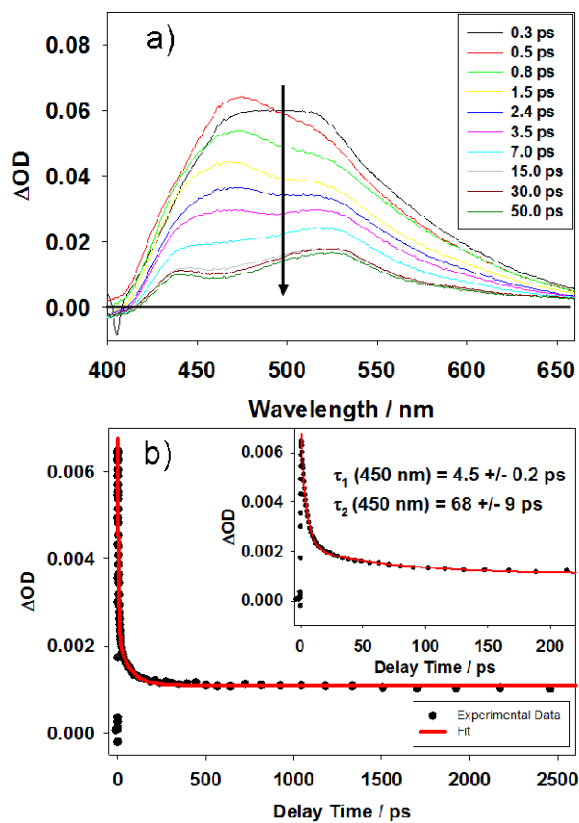

Figure S3: a) Femtosecond broadband transient absorption spectra for II in THF excited at 365 nm. b) Representative single wavelength kinetics monitored at 450 nm. Inset: Early time kinetics

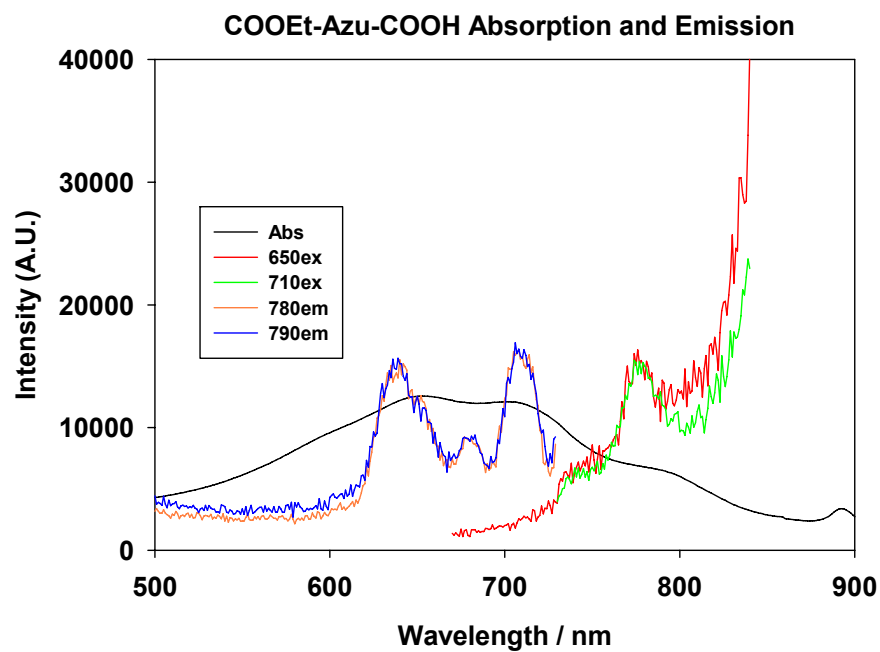

Figure S4: Absorption, emission, and excitation spectra for the azulene carboxylic acid ligand.

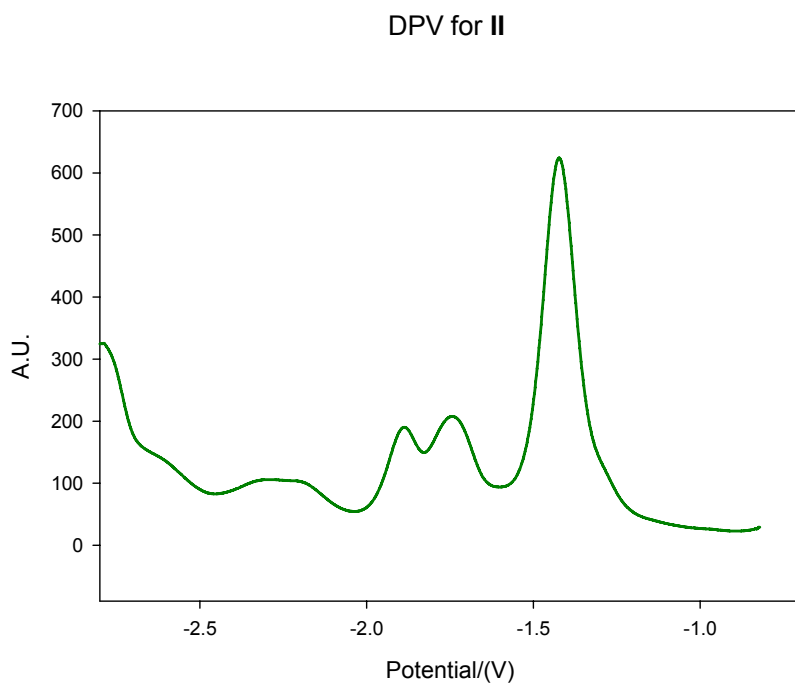

Figure S5: DPV showing the reduction of II in THF

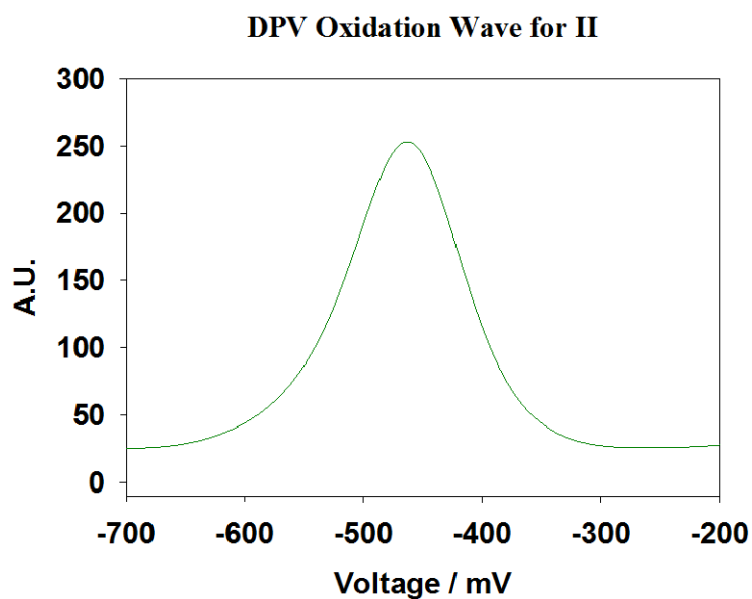

Fig S6: DPV showing the oxidation of II in THF

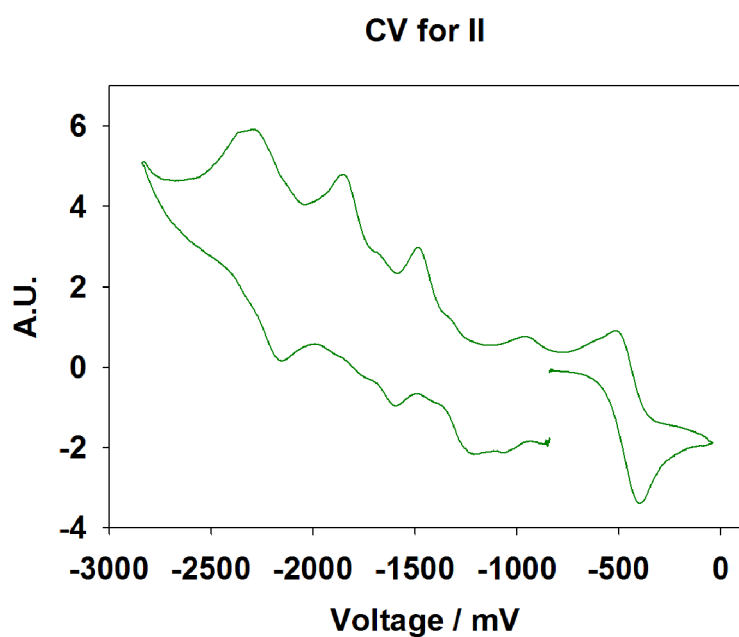

Fig S7: CV showing the oxidation and reduction of II in THF

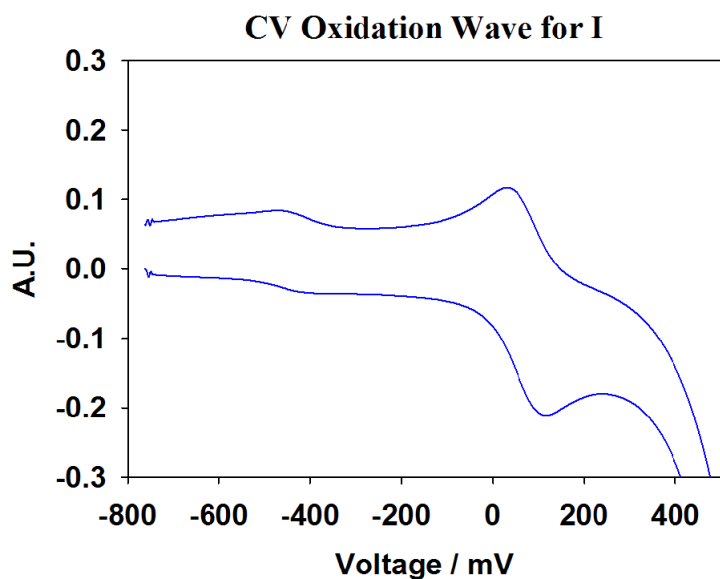

Fig S8: CV showing the oxidation of I in THF

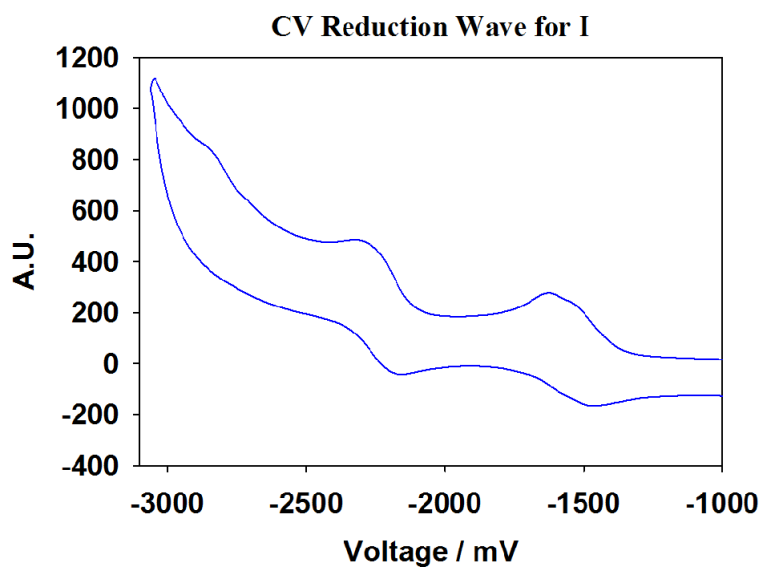

Fig S9: CV showing the reduction of I in THF
